# Supplementary material
Source: publisher figshare collection journal article supplement (https://sage.figshare.com/ndownloader/files/15086297)
Supplement: Supplementary file 1 [file 15086297]

**Supplementary material**

a)


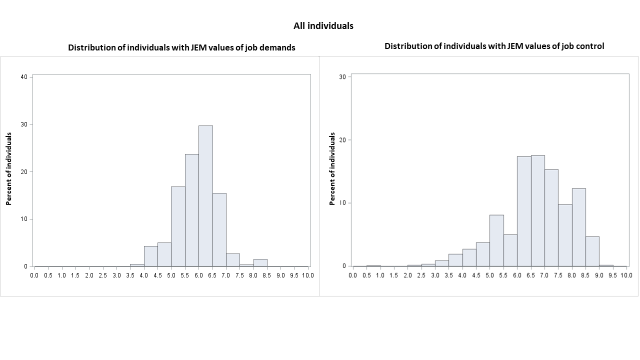
b)


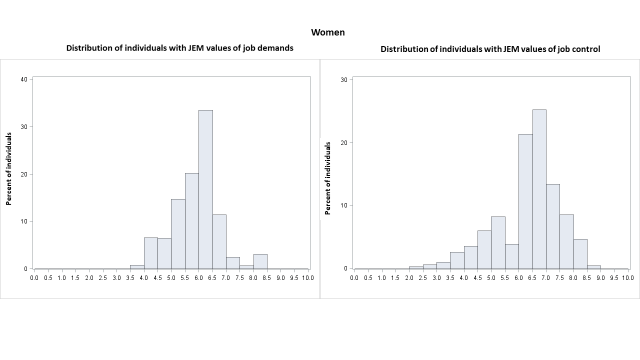
c)


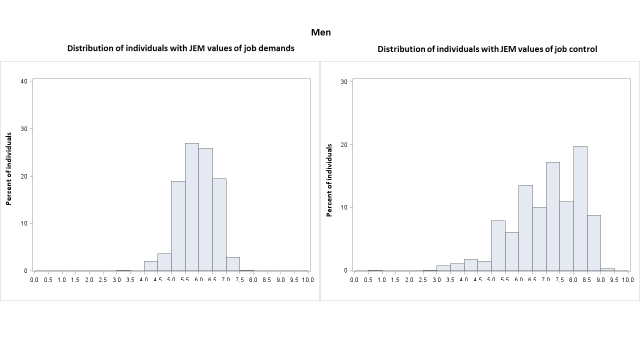


**Supplementary figure 1.** Histograms of the rates of individuals with different Job Exposure Matrix values (x-axis) for job demands and job control, respectively, among a) all individuals in paid work in 2001 in Sweden (n=2 194 694), b) women (n=1 082 490), and c) men (n=1 112 204)

**Supplementary table 1. Questions used to construct the Job Exposure Matrix for psychosocial job demands and control in Sweden, from Fredlund *et al.*, 2001.**

| Demands: |
| --- |
| - Is it at times so stressful that you don’t have time to talk or even think about anything other than work? |
| - Do you sometimes have so much to do that you have to skip lunches, work overtime, or bring your work home? |
| - Does your work demand all your attention and concentration? |
| - To what degree of your working time do you have such difficult tasks that you need help? |
| Control: |
| - Are you partly able to determine yourself when different tasks are to be done (e.g. by choosing to work a little faster some days and a bit easier other days?) |
| - Do you have the possibility to determine your own pace at work? |
| - Are you able to take short breaks essentially any time to talk? |
| - Are you ever part of deciding your working arrangements (e.g. what shall be done, how it shall be done, or who shall work with you)? |
| - Does your work sometimes require you to repeat the same work task several times an hour? |

**Supplementary table 2. Adjusted1 odds ratios2 (OR) with 95% confidence intervals (CI) of long-term sickness absence (SA)/disability pension(DP) or unemployment as opposed to not, presented for all people in paid work in Sweden in 2001 (N=2 194 694), as well as for women (N=1 082 490) and men (N=1 112 204)**

|  | ***SA and/or DP >183 net days*** | ***Unemployed >183 days*** |
| --- | --- | --- |
|  | ***Adjusted OR (95% CI)*** | ***Adjusted OR (95% CI)*** |
| *All* |  |  |
| *Sex* |  |  |
| Women | 2.89 (2.83-2.96) | 0.80 (0.78-0.81) |
| Men | Ref | Ref |
| *Age group* |  |  |
| 25-34 years | 0.59 (0.57-0.61) | 0.86 (0.84-0.88) |
| 35-44 years | Ref | Ref |
| 45-54 years | 1.42 (1.40-1.45) | 0.97 (0.95-0.99) |
| *Birth country* |  |  |
| Sweden | Ref | Ref |
| Other Nordic country | 1.13 (1.09-1.18) | 1.28 (1.22-1.34) |
| Other EU25 | 1.20 (1.13-1.27) | 1.88 (1.77-2.00) |
| Rest of world | 1.38 (1.34-1.43) | 3.94 (3.84-4.05) |
| *Type of living area* |  |  |
| Large cities | Ref | Ref |
| Medium-sized towns | 1.13 (1.11-1.16) | 1.63 (1.59-1.66) |
| Small towns/rural | 1.26 (1.23-1.29) | 2.00 (1.95-2.04) |
| *Educational level* |  |  |
| University/college | 0.79 (0.77-0.81) | 0.50 (0.49-0.51) |
| High school | Ref | Ref |
| Elementary education | 1.26 (1.24-1.29) | 1.11 (1.09-1.14) |
| *Family situation* |  |  |
| Maried with children | Ref | Ref |
| Married without children | 1.27 (1.24-1.31) | 1.26 (1.22-1.20) |
| Single with children | 1.50 (1.46-1.53) | 2.01 (1.95-2.07) |
| Single without children | 1.41 (1.38-1.44) | 2.36 (2.32-2.41) |
| *Women* |  |  |
| *Age group* |  |  |
| 25-34 years | 0.60 (0.58-0.62) | 0.91 (0.88-0.94) |
| 35-44 year | Ref | Ref |
| 45-54 years | 1.39 (1.36-1.42) | 0.85 (0.82-0.88) |
| *Birth country* |  |  |
| Sweden | Ref | Ref |
| Other Nordic country | 1.12 (1.07-1.17) | 1.26 (1.18-1.35) |
| Other EU25 | 1.15 (1.07-1.23) | 2.37 (2.20-2.57) |
| Rest of world | 1.24 (1.19-1.29) | 3.80 (3.65-3.95) |
| *Type of living area* |  |  |
| Large cities | Ref | Ref |
| Medium-sized towns | 1.16 (1.14-1.19) | 1.73 (1.67-1.79) |
| Small towns/rural | 1.29 (1.25-1.32) | 2.10 (2.03-2.18) |
| *Educational level* |  |  |
| University/college | 0.84 (0.81-0.86) | 0.48 (0.46-0.50) |
| High school | Ref | Ref |
| Elementary education | 1.28 (1.24-1.32) | 1.21 (1.16-1.25) |
| *Family situation* |  |  |
| Married with children | Ref | Ref |
| Married without children | 1.25 (1.22-1.29) | 1.26 (1.20-1.32) |
| Single with children | 1.50 (1.46-1.54) | 2.06 (1.99-2.13) |
| Single without children | 1.39 (1.36-1.43) | 2.22 (2.15-2.30) |
| *Men* |  |  |
| *Age group* |  |  |
| 25-34 years | 0.56 (0.53-0.59) | 0.83 (0.81-0.86) |
| 35-44 years | Ref | Ref |
| 45-54 years | 1.56 (1.51-1.62) | 1.07 (1.04-1.10) |
| *Birth country* |  |  |
| Sweden | Ref | Ref |
| Other Nordic country4 | 1.18 (1.08-1.28) | 1.30 (1.23-1.38) |
| Other EU25 | 1.36 (1.22-1.53) | 1.46 (1.34-1.60) |
| Rest of world | 1.76 (-166-1.87) | 3.92 (3.79-4.06) |
| *Type of living area* |  |  |
| Large cities | Ref | Ref |
| Medium-sized towns | 1.04 (1.00-1.08) | 1.57 (1.52-1.61) |
| Small towns/rural | 1.16 (1.12-1.21) | 1.94 (1.88-2.00) |
| *Educational level* |  |  |
| University/college | 0.64 (0.61-0.68) | 0.50 (0.49-0.52) |
| High school | Ref | Ref |
| Elementary education | 1.19 (1.14-1.24) | 1.04 (1.01-1.07) |
| *Family situation* |  |  |
| Married with children | Ref | Ref |
| Married without children | 1.37 (1.29-1.45) | 1.28 (1.22-1.34) |
| Single with children | 1.49 (1.38-1.61) | 1.77 (1.67-1.87) |
| Single without children | 1.44 (1.39-1.49) | 2.46 (2.40-2.52) |

1Mutually adjusted for sex, age, birth country, education, type of living area, family situation, job demands/job control group.

2Using multinomial logistic regression, those with no long-term SA/DP or unemployment used as reference.
